# Supplementary material for: An electron-rich small AIEgen as a solid platform for the selective and ultrasensitive on-site visual detection of TNT in the solid, solution and vapor states
Source: Royal Society of Chemistry journal article supplement (doi:10.1039/c9an02334h), 2019-12-10
Supplement: c9an02334h1.pdf [file c9an02334h1.pdf]

## An electron-rich small AIEgen as a solid platform for selective and ultrasensitive on-site visual detection of TNT in solid, solution and vapor states

Banchhanidhi Prusti and Manab Chakravarty\*

Department of Chemistry, Birla Institute of Technology and Science, Pilani-Hyderabad Campus, Jawahar Nagar,  
Shamirpet Mandal, Hyderabad, Telangana-500078, India.

[manab@hyderabad.bits-pilani.ac.in](mailto:manab@hyderabad.bits-pilani.ac.in)

### Table of content

|                                                                                        |       |
|----------------------------------------------------------------------------------------|-------|
| Calculation of Optical band gap                                                        | S2    |
| Synthetic schemes of <b>TMOP</b> , <b>1</b> , <b>2</b> and <b>3</b> (Scheme S1)        | S2    |
| Single crystal X-ray structure for <b>1</b> (Figure S1)                                | S2    |
| AIE study (Figure S2)                                                                  | S2    |
| Limit of detection plot (Figure S3)                                                    | S3    |
| Lifetime decay plot for <b>1</b> (Figure S4)                                           | S3    |
| Lifetime decay table for compound <b>1</b> before and after addition of TNT (Table S1) | S3    |
| TNT <sup>1</sup> H NMR titration for <b>1</b> (Figure S5a-b)                           | S4    |
| Absorption spectra of analytes with emission spectra of <b>1</b> (Figure S6)           | S4    |
| Cyclic voltammetry graph (Figure S7)                                                   | S5    |
| Job's plot showing 1:1 binding ratio (Figure S8)                                       | S5    |
| Fluorescence quenching spectra with mixture of analytes (Figure S9a-b)                 | S5    |
| NMR spectra                                                                            | S6-S8 |

*Calculation of optical band gap:* The optical bandgap( $E_g$ ) of 2 and 3 were estimated from the intercept of the extrapolated linear fit for the plotted experimental data of  $(K^*E)^{1/2}$  versus incident photon energy ( $h\nu$ ) near the absorption edge. Where  $K$  = Kubelka Munk constant and  $E$  is the energy of electron. Ref: J. Tauc, Amorphous and Liquid Semiconductors, Plenum, New York, 1974.

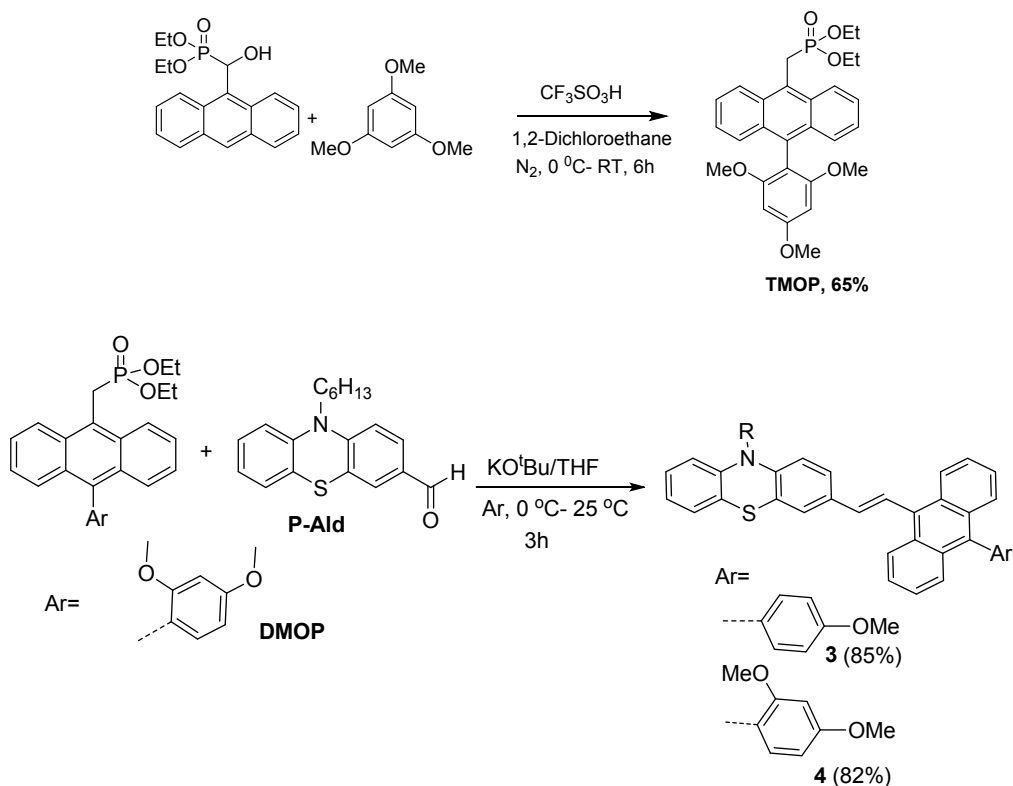

**Scheme S1** Synthetic route for **TMOP**, **1**, **2** and **3**

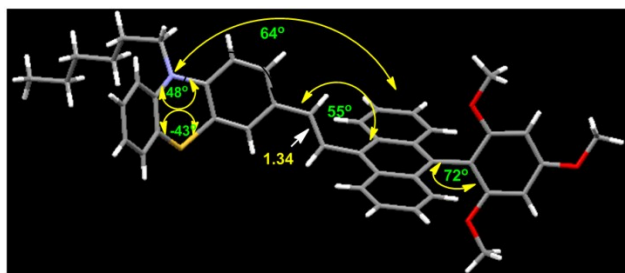

**Fig S1** Molecular structure of **1** with some selected bond and torsional angles

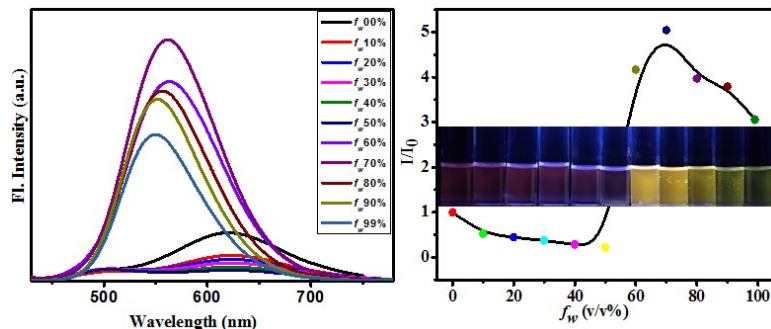

**Fig S2** (a) PL spectra of **1** in MeCN (10  $\mu$ M) by increasing  $f_w$ ; (b) PL intensity vs  $f_w$  (image of gradual change in the intensity and wavelength of **1**).  $\lambda_{ex}$ = 405 nm.

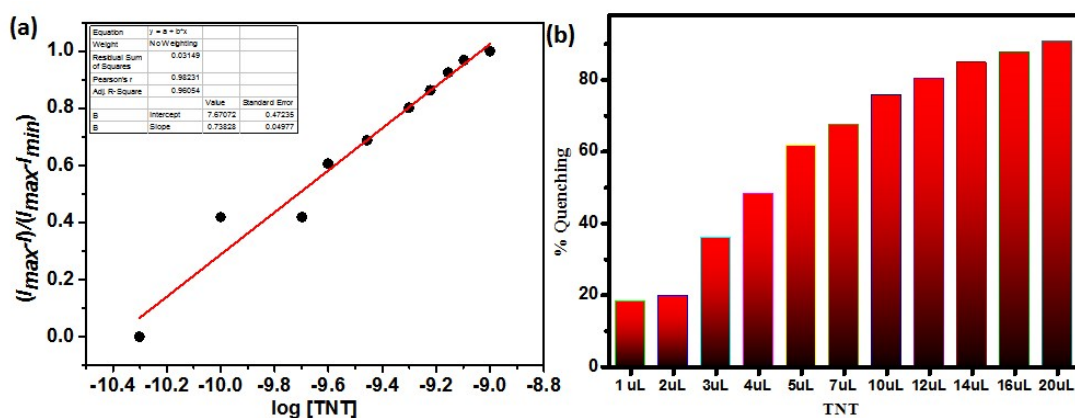

**Fig S3** (a) Limit of detection plot, Intercept -10.5; LOD=  $31.6 \times 10^{-10}$ =  $3.16 \times 10^{-9}$  (b) Quenching % of **1** upon incremental addition of TNT ( $10^{-8}$ M)

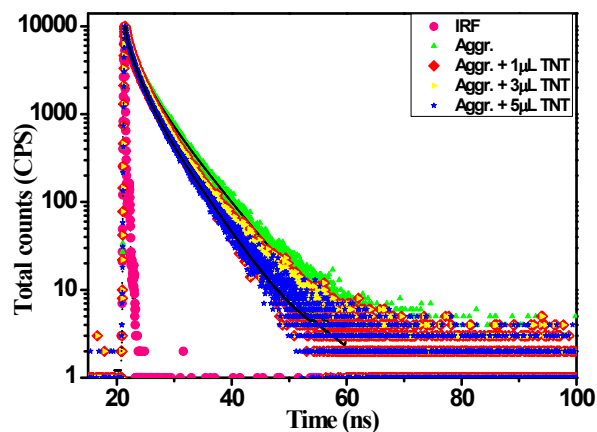

**Fig S4** Lifetime decay plots of aggregated compound **1** and after adding the TNT ( $10^{-8}$ M)

**Table S1** Lifetime (ns) fluorescence parameters.  $\lambda_{ex}$ = 405 nm

|                | $B_1'$ | $B_2'$ | $B_3'$ | $\tau_1$ | $\tau_2$ | $\tau_3$ | $\langle\tau\rangle$ | $\chi^2$ |
|----------------|--------|--------|--------|----------|----------|----------|----------------------|----------|
| Aggregate Of 1 | 0.58   | 0.12   | 0.30   | 2.14     | 0.34     | 5.19     | 2.86                 | 1.0      |
| +1 $\mu$ L TNT | 0.56   | 0.34   | 0.10   | 1.98     | 4.88     | 0.33     | 2.80                 | 1.01     |
| +3 $\mu$ L TNT | 0.65   | 0.24   | 0.11   | 2.19     | 5.33     | 0.38     | 2.75                 | 1.11     |
| +5 $\mu$ L TNT | 0.62   | 0.27   | 0.11   | 1.93     | 4.79     | 0.34     | 2.54                 | 1.03     |

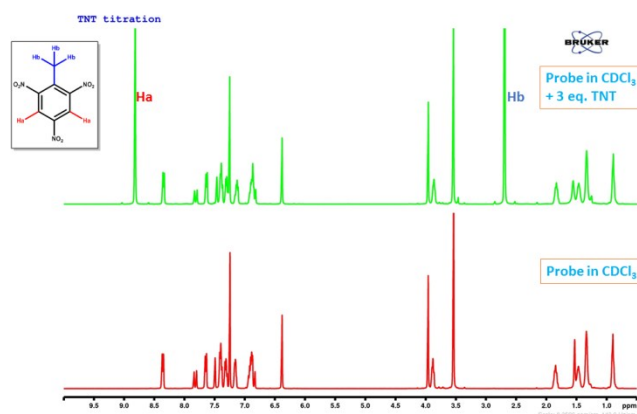

**Fig S5a**  $^1\text{H-NMR}$  (400 MHz) spectra of the AIEgen in  $\text{CDCl}_3$  and after addition of 3eq. TNT solution

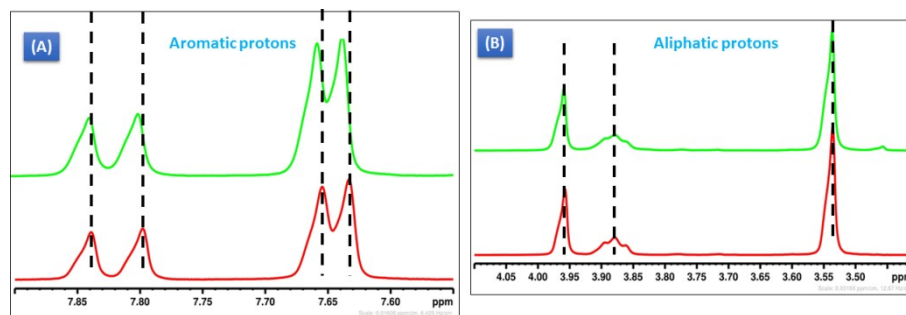

**Fig S5b** Expanded  $^1\text{H-NMR}$  (400 MHz) spectra from Fig 4a of the AIEgen in  $\text{CDCl}_3$  and after addition of 3eq. TNT solution (A) Showing the  $^1\text{H}$  chemical shift (downfield) after the addition of 3 eq. of TNT; (B) Showing no shift in  $^1\text{H}$  spectra after the addition of 3 eq. of TNT

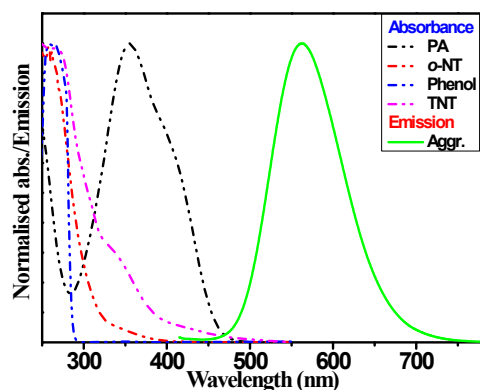

**Fig S6** Absorption spectra of few analytes (left) and emission spectrum of AlEgen (green, right)

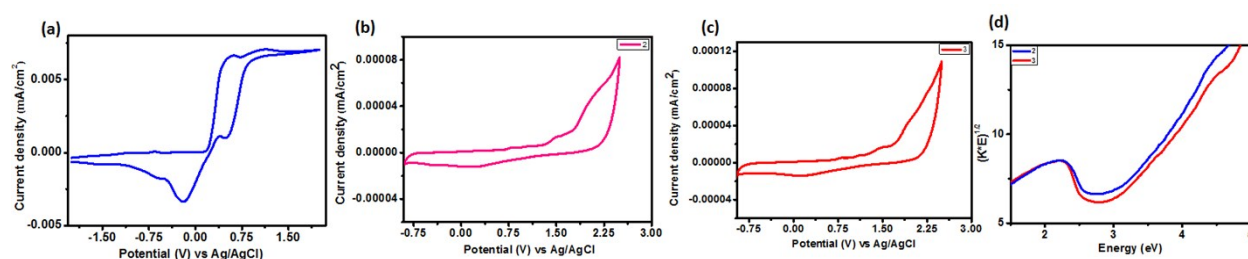

**Fig S7** The cyclic voltammograms of compounds (a) **1** (b) **2** (c) **3** in dichloromethane ( $10^{-5}$  M) under inert atmosphere  $N_2$  using Ag/AgCl as reference electrode.  $E_{LUMO} = -(E_{red} + 4.49)$ , (d) Tauc plot for compounds **2** (blue) and **3** (red).

LUMO calculation for **1**:  $E_{red}^0 = -0.731$  vs Ag/AgCl =  $-1.221$  vs Fe/Fe<sup>+</sup>; LUMO =  $-(E_{red}^0 + 4.8) = -(-1.221 + 4.8) = -3.579$  eV; LUMO calculation for **2**:  $E_{red}^0 = 0.167$  vs Ag/AgCl =  $-0.323$  vs Fe/Fe<sup>+</sup>; LUMO =  $-(E_{red}^0 + 4.8) = -(-0.323 + 4.8) = -4.477$  eV; LUMO calculation for **3**:  $E_{red}^0 = 0.105$  vs Ag/AgCl =  $-0.385$  vs Fe/Fe<sup>+</sup> LUMO =  $-(E_{red}^0 + 4.8) = -(-0.385 + 4.8) = -4.415$  eV. The LUMOs for **2** and **3** look be very low and therefore we have calculated the HOMO from CV and optical band gap from Tauc plot (suggested by one of the reviewers). The calculations are as follows:

HOMO Calculation for **2**:  $E_{oxd}^0 = 2.19$  vs Ag/AgCl =  $1.7$  vs Fe/Fe<sup>+</sup> HOMO =  $-(E_{oxd}^0 + 4.8) = -(1.70 + 4.8) = -6.50$  eV

HOMO Calculation for **3**:  $E_{oxd}^0 = 2.15$  vs Ag/AgCl =  $1.66$  vs Fe/Fe<sup>+</sup> HOMO =  $-(E_{oxd}^0 + 4.8) = -(1.66 + 4.8) = -6.46$  eV

From Tauc plot the the optical bandgap ( $E_g$ ) for **2** was found to be 2.7 and for **3** it was 2.68. Therefore, the calculated LUMOs are: For **2**:  $E_g = LUMO - HOMO$ ;  $2.70 = LUMO - (-6.5)$ , Thus LUMO =  $-3.80$  eV; For **3**:  $E_g = LUMO - HOMO$ ;  $2.68 = LUMO - (-6.46)$ ; Thus LUMO =  $-3.78$  eV.

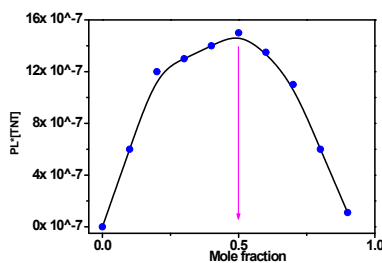

**Fig S8** Job's plot confirming the binding of compound **1**: TNT is 1:1

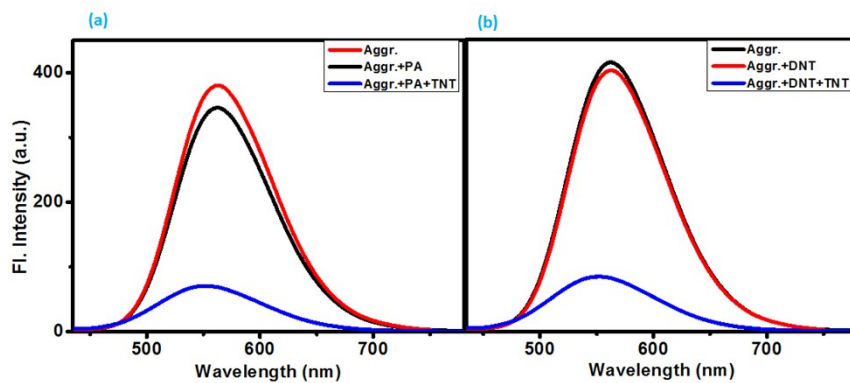

**Fig S9** (a) Fl. spectra of aggregate **1** ( $10^{-5}\text{M}$ ), aggr.+ PA ( $10\ \mu\text{L}$ ,  $10^{-3}\text{M}$ ) and aggregate **1**+PA ( $10\ \mu\text{L}$ ,  $10^{-3}\text{M}$ ) + TNT ( $10\ \mu\text{L}$ ,  $10^{-3}\text{M}$ ); (b) Fl. spectra of aggregate **1** ( $10^{-5}\text{M}$ ), aggregate **1** + DNT( $10\ \mu\text{L}$ ,  $10^{-3}\text{M}$ ) and aggregate **1**+ DNT ( $10\ \mu\text{L}$ ,  $10^{-3}\text{M}$ ) + TNT ( $10\ \mu\text{L}$ ,  $10^{-3}\text{M}$ ).

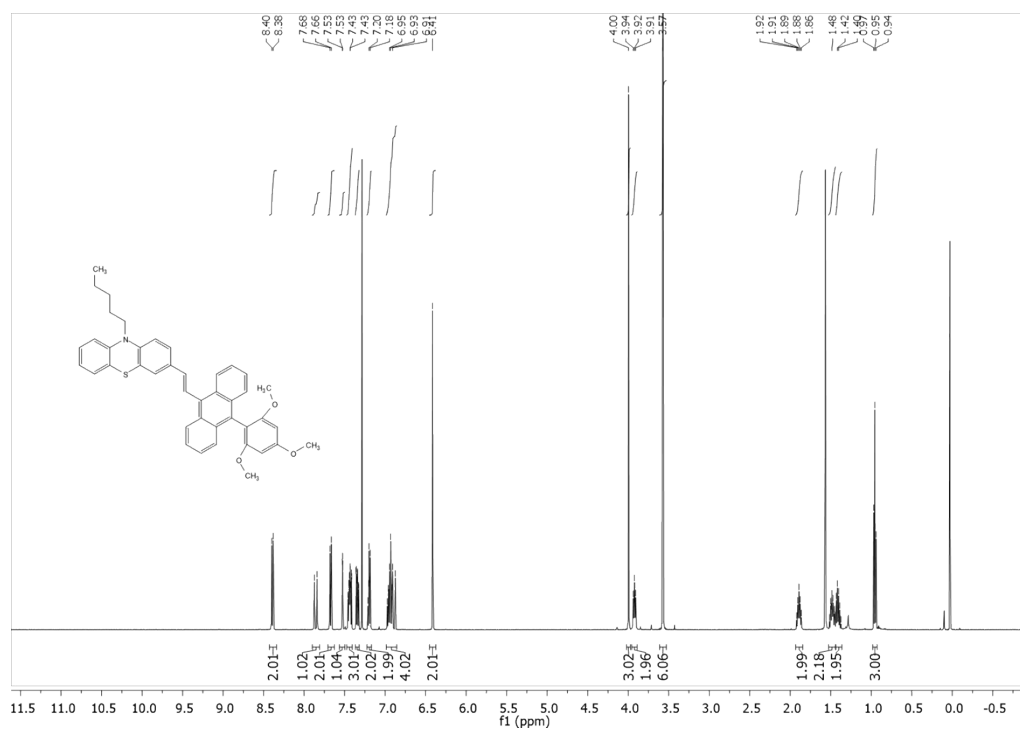

**Fig S10**  $^1\text{H}$  NMR spectrum of **1**

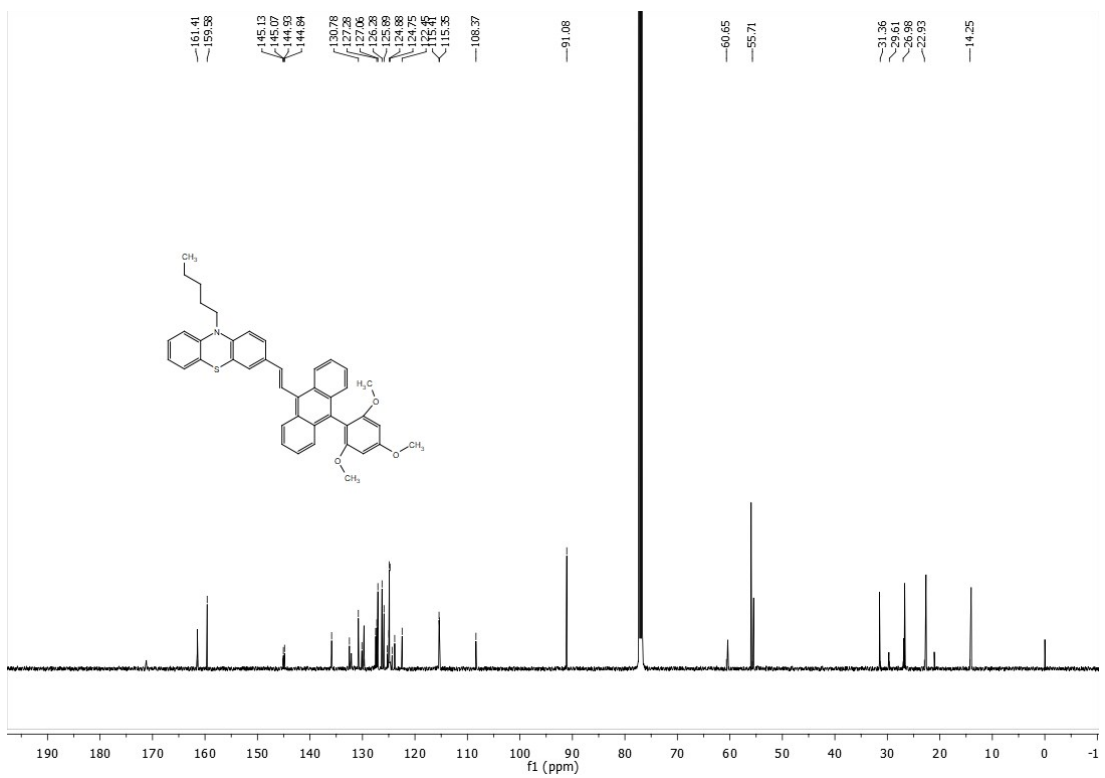

Fig S11 <sup>13</sup>C NMR spectrum of 1

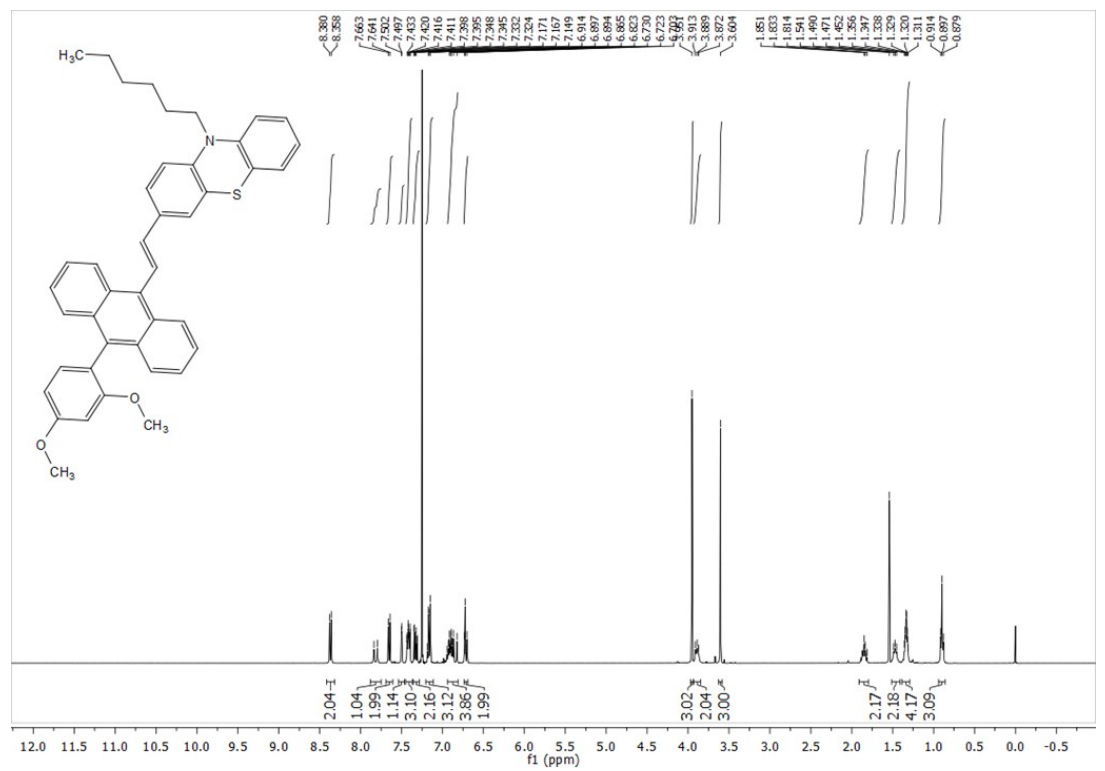

Fig S12 <sup>1</sup>H- NMR spectrum of 2.

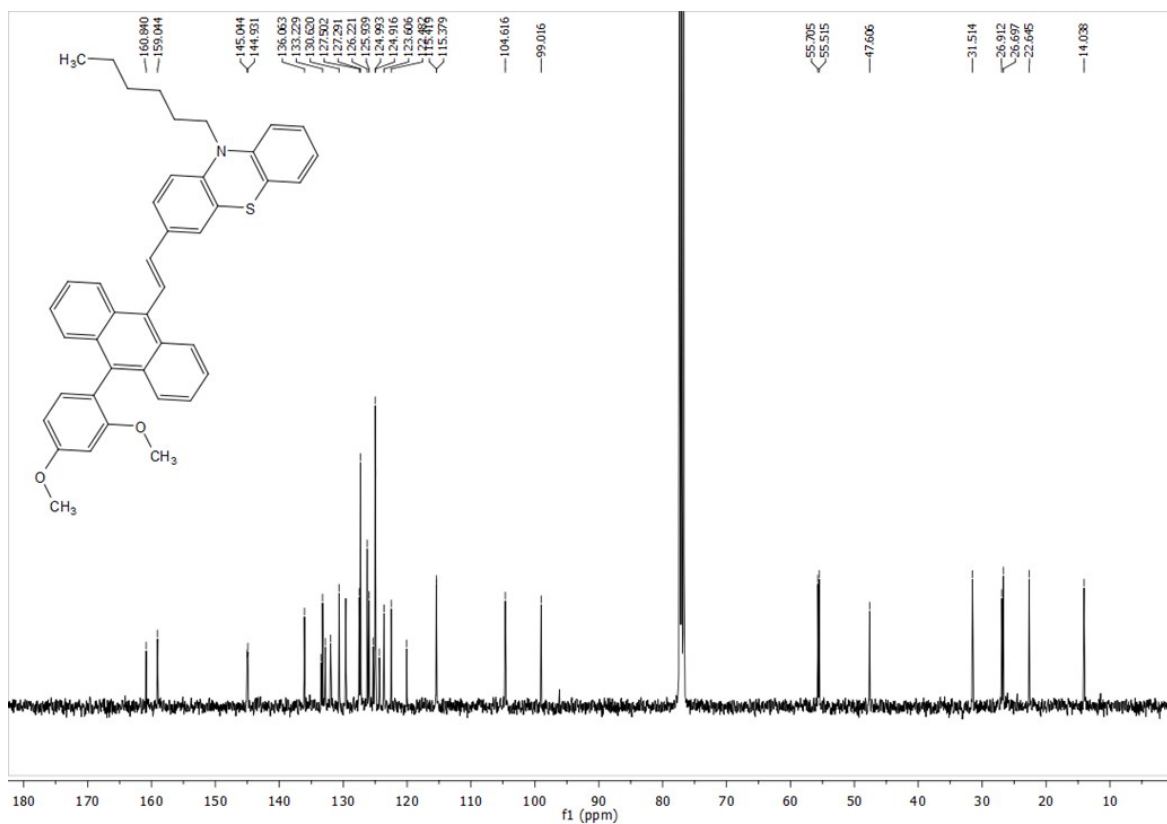

Fig S13  $^{13}\text{C}$ -NMR spectrum of 2.

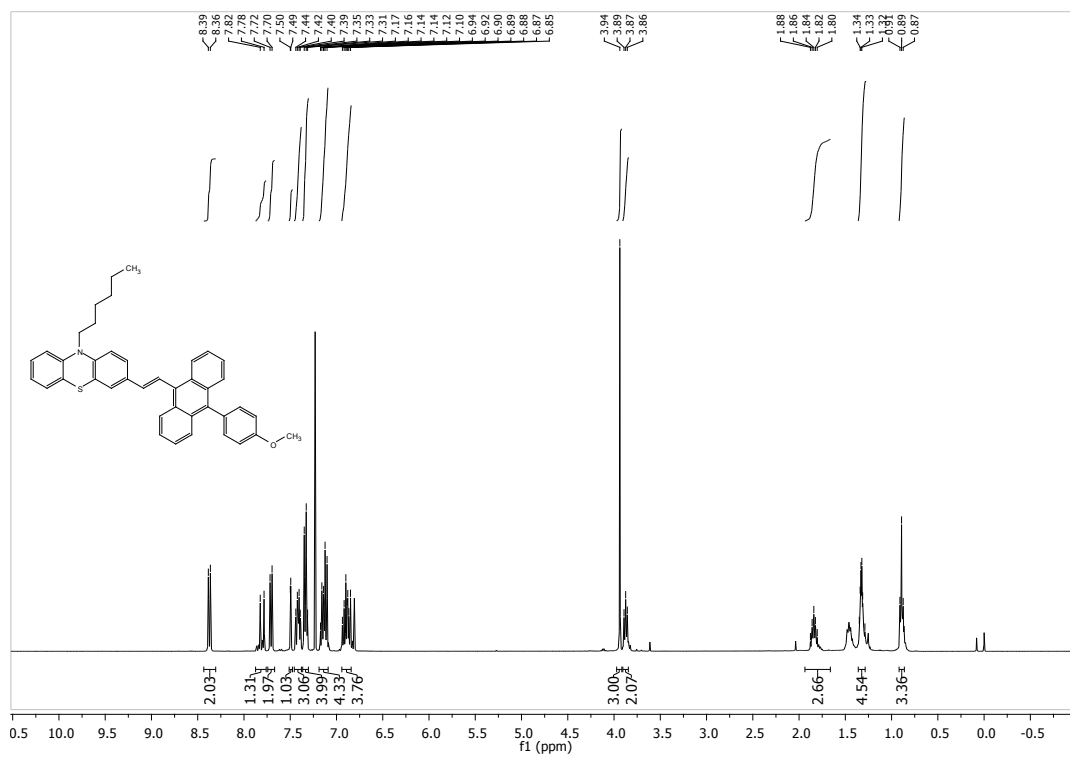

Fig S14  $^1\text{H}$ -NMR spectrum of 3



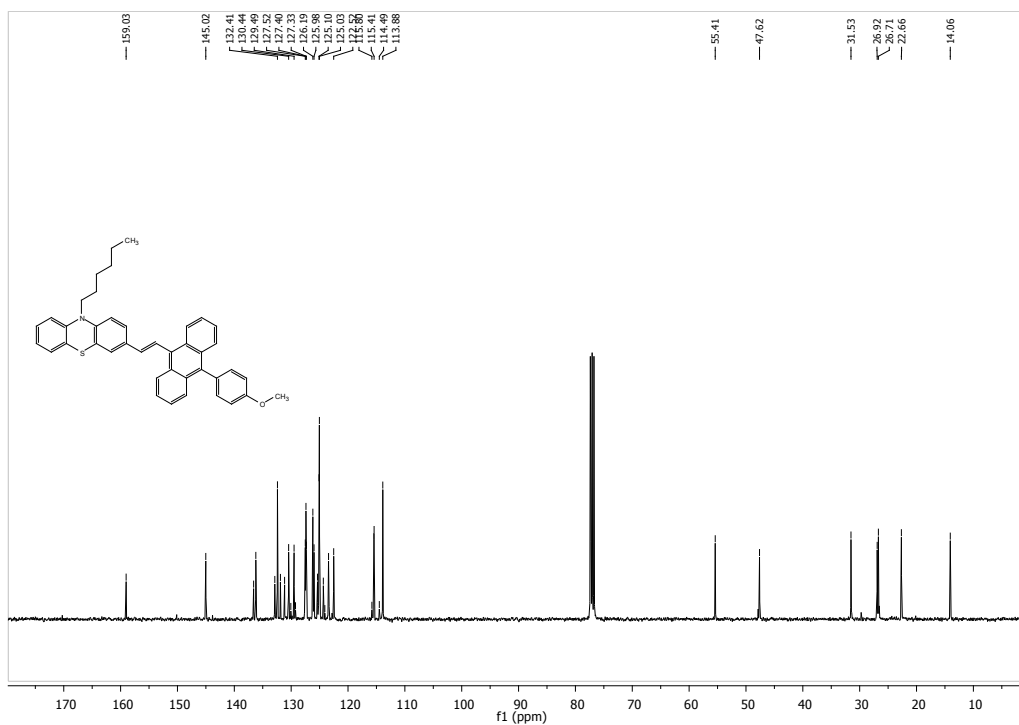

Fig S15  $^{13}\text{C}$  NMR spectrum of **3**

END
